# Supplementary material
Source: Springer Nature journal article supplement (https://www.springermedizin.de/resource/supplementary/13014_2013_875_MOESM4_ESM.pdf/9634298)

DAR\_SpacerGelVial-CT.ctx

A

Slice: 17 49,50 mm

F : 375 226,45 - 227,05 mm

S : 463 279,73 - 280,33 mm

Air bubbles

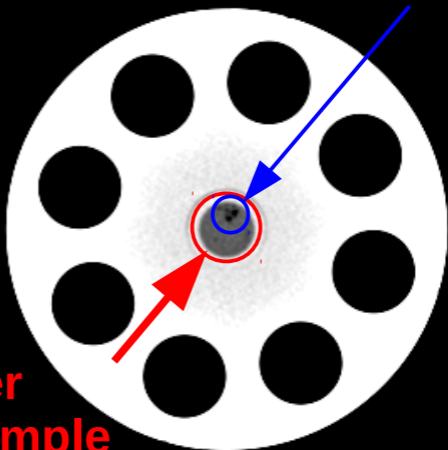

Spacer  
gel sample

Supplement: MOESM4 [file 9634298]
